# Supplementary material
Source: Springer Nature journal article supplement (https://www.springermedizin.de/resource/supplementary/12886_2014_450_MOESM3_ESM.pdf/9474278)

OD

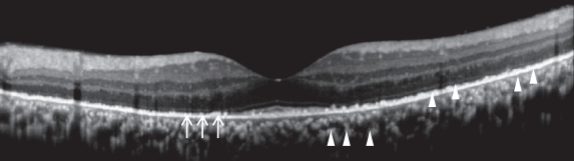

OS

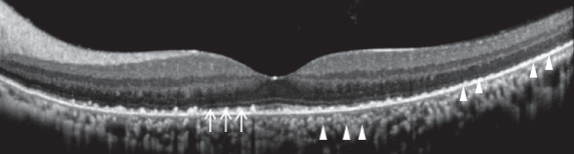

Supplement: MOESM3 [file 9474278]
